# Supplementary material for: Investigating the effectiveness of different aspirin dosing regimens and the timing of aspirin intake in primary and secondary prevention of cardiovascular disease: protocol for a systematic review
Source: PubMed Central journal article supplement (PMC4475616; doi:10.1186/s13643-015-0078-3), 2015-06-19
Supplement: 13643_2015_78_MOESM2_ESM.pdf [file 13643_2015_78_MOESM2_ESM.pdf]

## Additional file 2

**Database: Ovid MEDLINE(R) <1946 to September Week 4 2014>**

### **Search Strategy:**

- 1 (twice adj2 (day or daily)).mp. [mp=title, abstract, original title, name of substance word, subject heading word, keyword heading word, protocol supplementary concept word, rare disease supplementary concept word, unique identifier] (43793)
- 2 (once adj2 (day or daily)).ti,ab. (36498)
- 3 daily administrat\$.ti,ab. (5557)
- 4 or/1-3 (77654)
- 5 exp Aspirin/ (38799)
- 6 acetylsalicylic acid.ti,ab. (7147)
- 7 ASA.ti,ab. (16794)
- 8 aspirin.ti,ab. (35635)
- 9 or/5-8 (68035)
- 10 4 and 9 (1052)
- 11 (aspirin adj4 (regime\$ or timing or time or circadian or evening or morning or alternate or split or frequency or "every other" or night\$ or bedtime\$ or awakening or waking or chrono\$)).ti,ab. (981)
- 12 10 or 11 (1971)
- 13 exp Cardiovascular Diseases/ (1915641)
- 14 exp Coronary Artery Disease/ (39128)
- 15 exp Diabetes Mellitus/ (322380)
- 16 exp Cerebrovascular Disorders/ (285128)
- 17 exp Hypertension/ (214204)
- 18 exp Thrombocythemia, Essential/ (2318)
- 19 heart disease\$.ti,ab. (120817)

- 20 diabetes.mp. or diabetic.ti,ab. [mp=title, abstract, original title, name of substance word, subject heading word, keyword heading word, protocol supplementary concept word, rare disease supplementary concept word, unique identifier] (439948)
- 21 coronary artery disease\$.ti,ab. (58103)
- 22 thrombocythemia.ti,ab. (2676)
- 23 (cerebrovascular adj (disease\$ or disorder\$)).ti,ab. (15218)
- 24 hypertension.ti,ab. (268810)
- 25 blood pressure.ti,ab. (215817)
- 26 stroke.mp. or strokes.ti,ab. [mp=title, abstract, original title, name of substance word, subject heading word, keyword heading word, protocol supplementary concept word, rare disease supplementary concept word, unique identifier] (179902)
- 27 or/13-26 (2436265)
- 28 12 and 27 (1059)
- 29 limit 28 to humans (992)
